# Supplementary material for: Mutation spectrum of the OPA1 gene in a large cohort of patients with suspected dominant optic atrophy: Identification and classification of 48 novel variants
Source: PubMed Central journal article supplement (PMC8270428; doi:10.1371/journal.pone.0253987), 2021-07-09

Suppl FigS2A

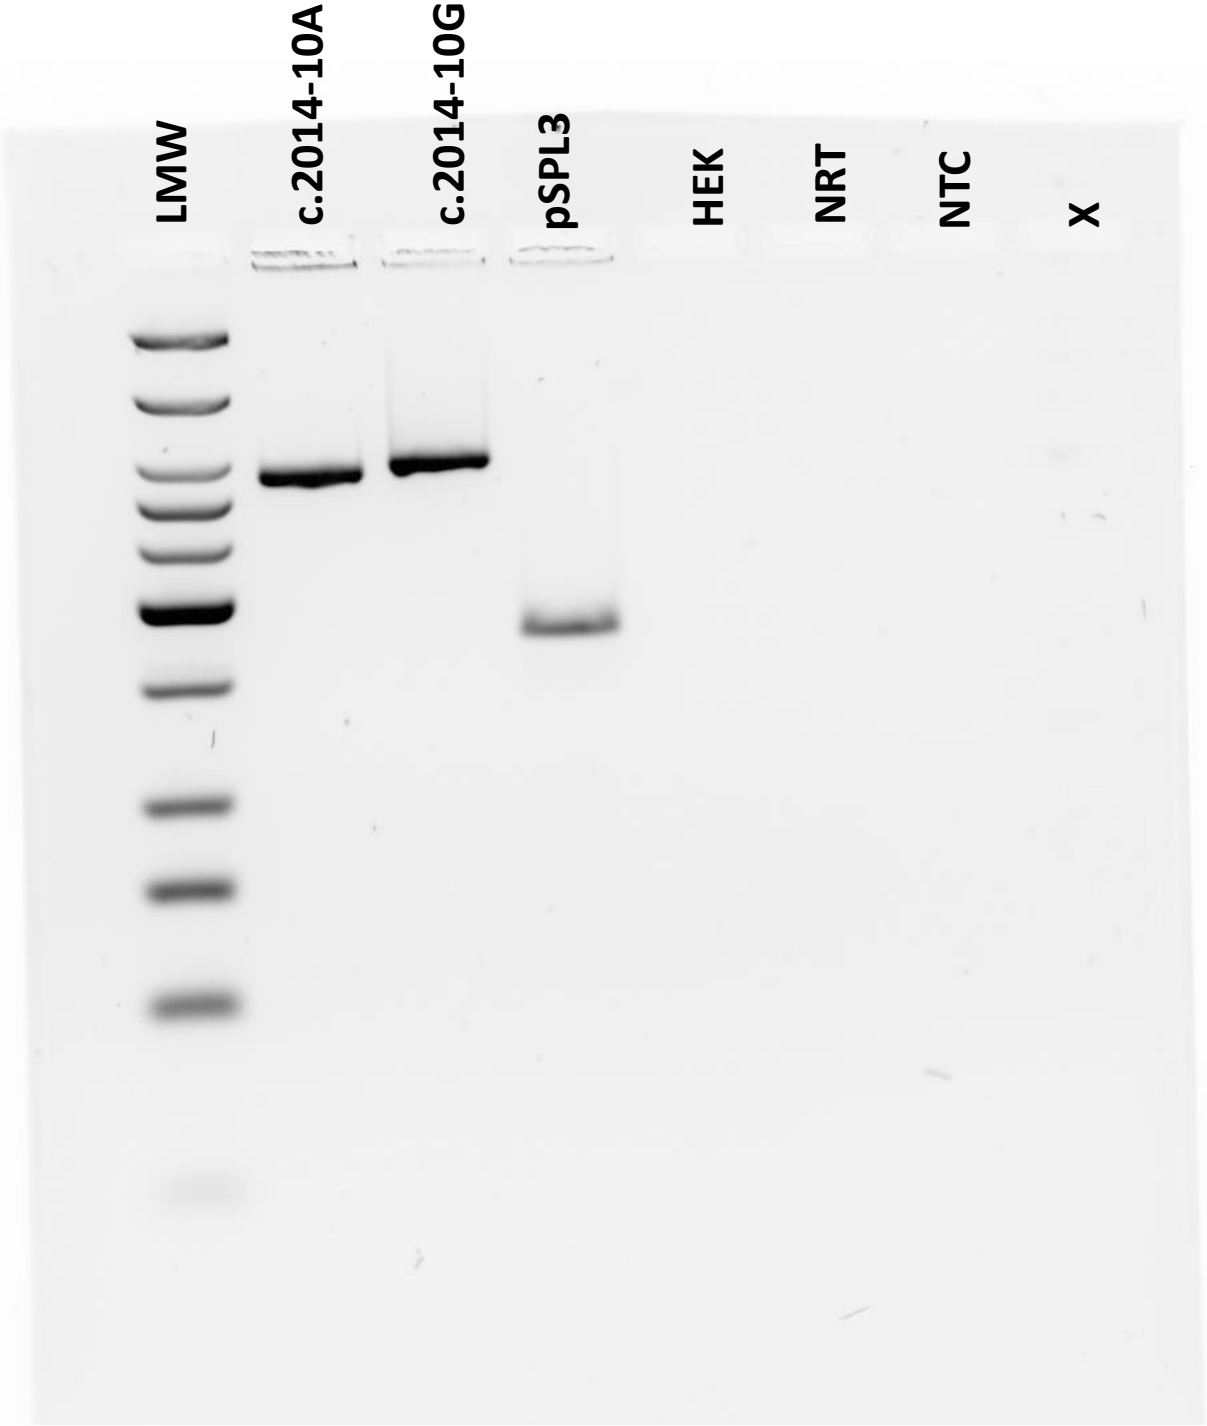

Suppl FigS2B

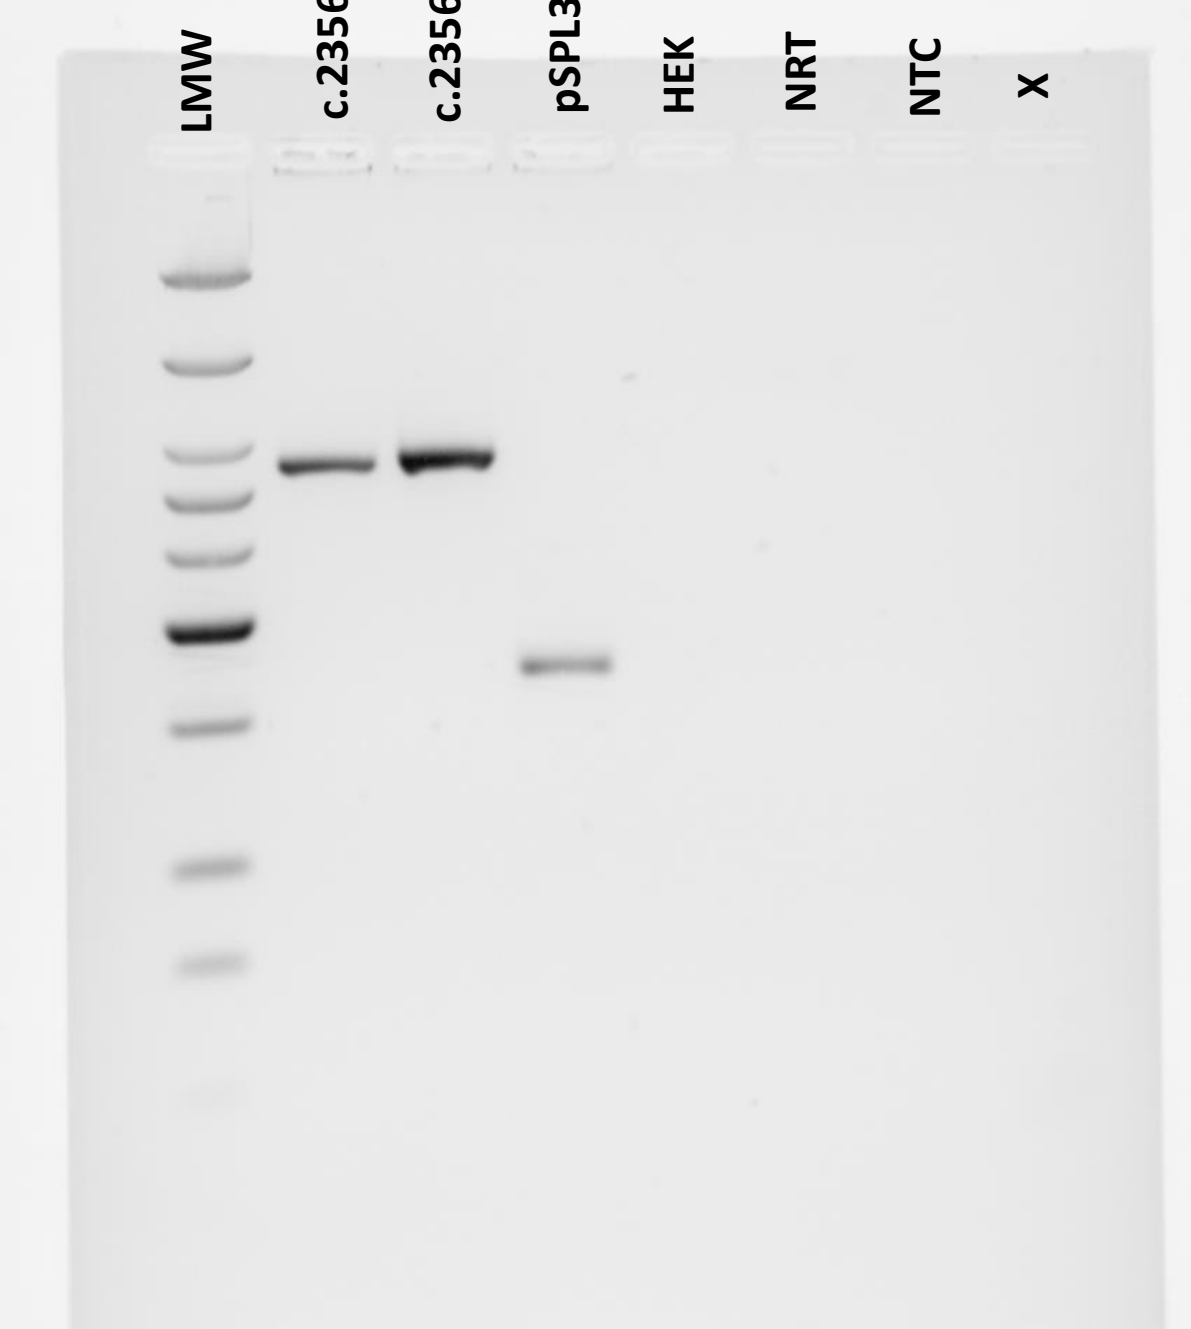

Supplement: pone.0253987.s003.pdf [file pone.0253987.s003.pdf]
